# Supplementary material for: Fluorescence quenching of deprotonated phenylurea through twisting motion induced by an electron-donating substituent group
Source: Royal Society of Chemistry journal article supplement (doi:10.1039/d4cp02077d), 2024-01-01
Supplement: d4cp02077d1.pdf [file d4cp02077d1.pdf]

## Supplementary information for

### **Fluorescence quenching of deprotonated phenylurea through twisting motion induced by electron-donating substituent group**

Hang Su,<sup>a</sup> Qian Yang,<sup>b</sup> Meng-Huan Jiang,<sup>b</sup> Ya-Jing Peng,<sup>b</sup> Jun Gao,<sup>c</sup> Yu-Hui Liu<sup>\*b</sup>

and Chaoyuan Zhu<sup>\*cd</sup>

<sup>a</sup>*College of Mathematical Science, Bohai University, Jinzhou 121013, China*

<sup>b</sup>*College of Physical Science and Technology, Bohai University, Jinzhou 121013, China*

<sup>c</sup>*Hubei Key Laboratory of Agricultural Bioinformatics, College of Informatics, Huazhong Agricultural University, Wuhan, 430070, P. R. China.*

<sup>d</sup>*Department of Applied Chemistry and Institute of Molecular Science, National Yang Ming Chiao Tung University, Hsinchu 30010, Taiwan.*

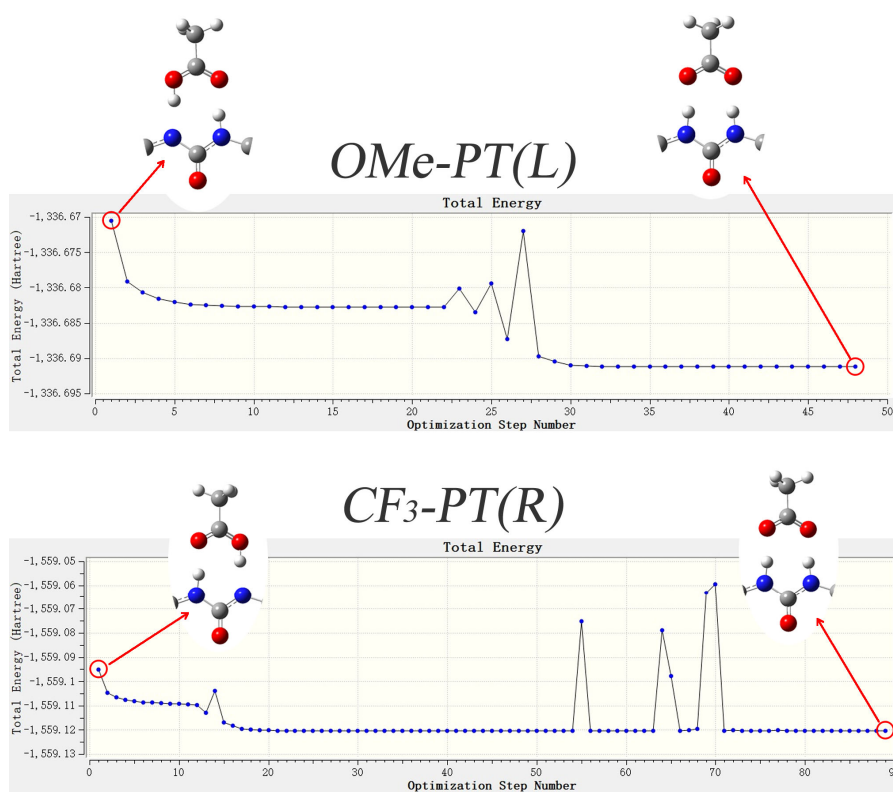

**Figure S1.** The plots of total energy changes in optimizations of OMe-PT(L) and CF<sub>3</sub>-PT(R) structures in S<sub>1</sub> state.

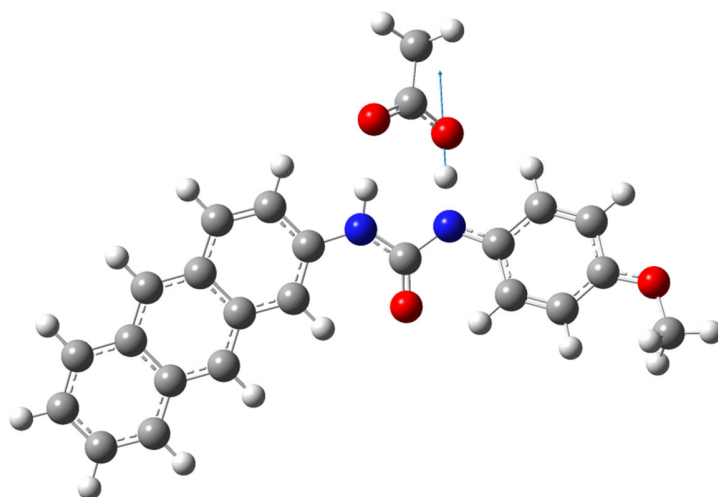

**Figure S2.** The structure and imaginary frequency of TS for the ESPT(R) in OMe-2PUA:AcO<sup>-</sup>.

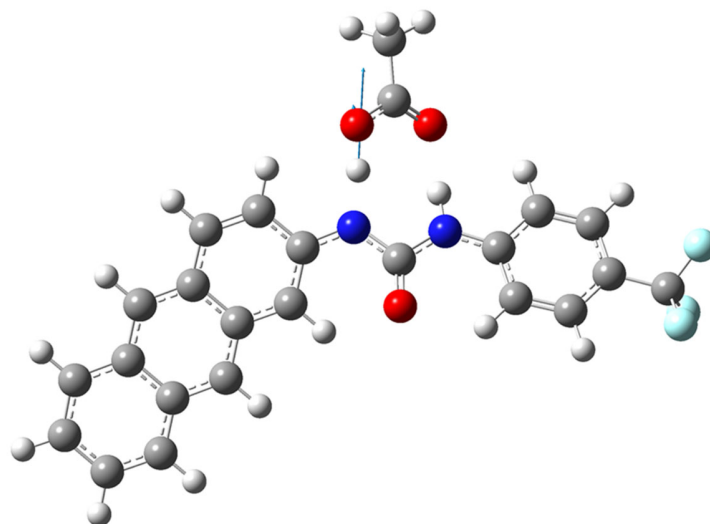

**Figure S3.** The structure and imaginary frequency of TS for the ESPT (L) in  $\text{CF}_3\text{-2PUA}:\text{AcO}^-$ .

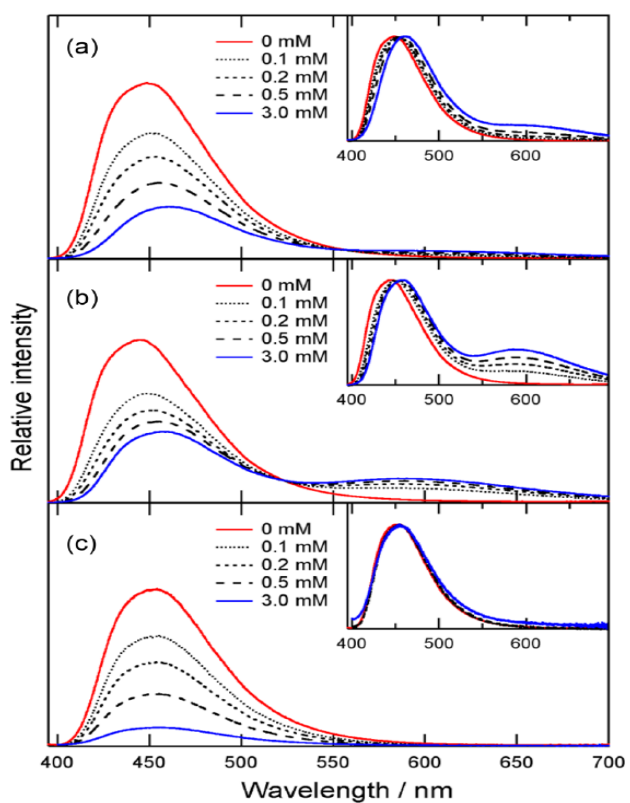

**Figure S4.** The experimental fluorescence spectra of (a) 2PUA, (b)  $\text{CF}_3\text{-2PUA}$ , and (c)  $\text{OMe-2PUA}$  with addition of TBAAc from Ref. 30 (Photochem. Photobio. Sci., 2021, 20, 523–532).

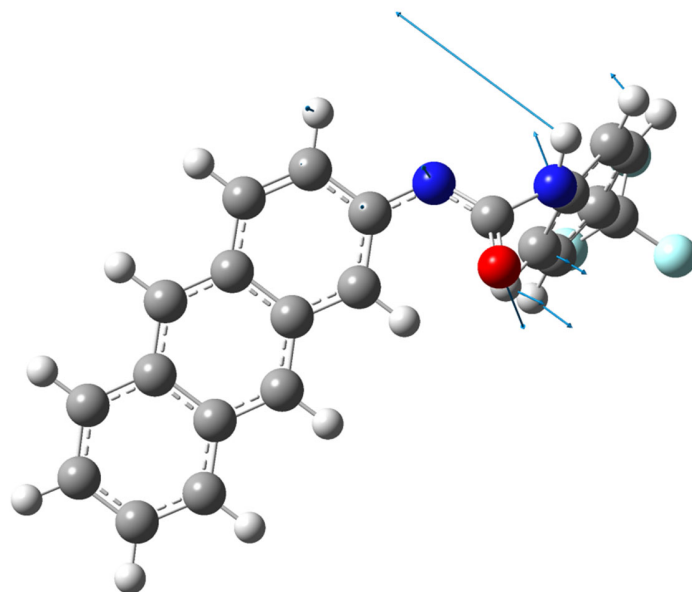

**Figure S5.** The structure and imaginary frequency of TS for twisting motion of  $\text{CF}_3\text{-2PUA}^-$ .

**Table S1. Cartesian coordinates (in Å) for all optimized geometries of for both stable structures and transition states at the PBE0/TZVP level of theory.**

**1. OMe-2PUA in S<sub>0</sub> state.**

Charge = 0 Multiplicity = 1

|   |             |             |             |
|---|-------------|-------------|-------------|
| C | 5.64354700  | 0.02252500  | 0.00051400  |
| C | 4.84532000  | 1.21315900  | -0.07670600 |
| C | 5.50680200  | 2.47110500  | -0.15728500 |
| C | 6.86767300  | 2.54696600  | -0.16108100 |
| C | 7.65600400  | 1.36920700  | -0.08451800 |
| C | 7.06073600  | 0.14546400  | -0.00622600 |
| C | 3.45535200  | 1.10673500  | -0.07114400 |
| C | 2.81672500  | -0.13016000 | 0.00701300  |
| C | 3.61862100  | -1.31692100 | 0.08359600  |
| C | 5.00564500  | -1.21494100 | 0.07912300  |
| C | 2.94875500  | -2.57021400 | 0.16196000  |
| C | 1.59405800  | -2.64092000 | 0.16276000  |
| C | 0.79260800  | -1.45943500 | 0.08632000  |
| C | 1.39888600  | -0.23374000 | 0.01016800  |
| N | -0.58479300 | -1.67381500 | 0.09142400  |
| C | -1.58683900 | -0.73165900 | 0.04737200  |
| N | -2.83470800 | -1.29465000 | 0.01549900  |
| C | -4.06667600 | -0.62424900 | -0.02581300 |
| C | -5.18279100 | -1.35138100 | -0.45065200 |
| C | -6.43524400 | -0.77439300 | -0.48279500 |
| C | -6.60903000 | 0.55515100  | -0.09956400 |
| C | -5.50394500 | 1.28520700  | 0.32164600  |
| C | -4.24359500 | 0.69790900  | 0.36639200  |
| O | -7.87417200 | 1.04145900  | -0.17096600 |
| C | -8.08190200 | 2.38477600  | 0.22006800  |
| O | -1.38183000 | 0.47182200  | 0.04342900  |
| H | 4.90364700  | 3.37128800  | -0.21598200 |
| H | 7.35801300  | 3.51204200  | -0.22299800 |
| H | 8.73707100  | 1.45041700  | -0.08895000 |
| H | 7.65976500  | -0.75751800 | 0.05223300  |
| H | 2.85546700  | 2.00984200  | -0.12983000 |
| H | 5.60469400  | -2.11881300 | 0.13762600  |
| H | 3.53968400  | -3.47791400 | 0.22088400  |
| H | 1.10238800  | -3.60685700 | 0.22239500  |
| H | 0.80288000  | 0.66463200  | -0.04479400 |
| H | -0.85978400 | -2.64176900 | 0.14636800  |
| H | -2.89482500 | -2.29394900 | -0.09912300 |
| H | -5.06618500 | -2.38508300 | -0.75994100 |
| H | -7.29553900 | -1.34550800 | -0.81168700 |
| H | -5.60307700 | 2.31774700  | 0.62953700  |
| H | -3.39567500 | 1.27825700  | 0.69723200  |
| H | -9.14521500 | 2.57646900  | 0.09172600  |
| H | -7.51224700 | 3.07647800  | -0.40851900 |
| H | -7.81079400 | 2.54211100  | 1.26878100  |

## 2. OMe-2PUA in S<sub>1</sub> state.

Charge = 0 Multiplicity = 1

|   |             |             |             |
|---|-------------|-------------|-------------|
| C | 5.64678500  | 0.03832900  | 0.01139700  |
| C | 4.84283600  | 1.22710000  | -0.06519300 |
| C | 5.48207700  | 2.47545200  | -0.13668400 |
| C | 6.87724700  | 2.57631900  | -0.12688800 |
| C | 7.65039700  | 1.43026600  | -0.05000900 |
| C | 7.03885900  | 0.17006600  | 0.02054500  |
| C | 3.44196900  | 1.09119100  | -0.07887400 |
| C | 2.80144500  | -0.16476800 | -0.00185300 |
| C | 3.60615300  | -1.35187200 | 0.07142100  |
| C | 4.99817700  | -1.21939500 | 0.08655300  |
| C | 2.94779900  | -2.59389900 | 0.14437900  |
| C | 1.56347400  | -2.69546700 | 0.13213900  |
| C | 0.78086000  | -1.53980500 | 0.05813000  |
| C | 1.40948600  | -0.27344600 | -0.01841800 |
| N | -0.58919900 | -1.69880800 | 0.03866200  |
| C | -1.57672500 | -0.72793300 | 0.03448800  |
| N | -2.82609600 | -1.27283900 | -0.05967000 |
| C | -4.05578700 | -0.60311000 | -0.05738400 |
| C | -5.19654700 | -1.36944100 | -0.32445000 |
| C | -6.44963700 | -0.79776900 | -0.32437300 |
| C | -6.60360900 | 0.56392600  | -0.05851100 |
| C | -5.47508700 | 1.33160300  | 0.20663300  |
| C | -4.21056200 | 0.75394500  | 0.21101500  |
| O | -7.87161100 | 1.03942300  | -0.08195200 |
| C | -8.06330800 | 2.41540900  | 0.18867000  |
| O | -1.35208900 | 0.46807400  | 0.11036900  |
| H | 4.87400600  | 3.37221500  | -0.19744600 |
| H | 7.34750200  | 3.55130200  | -0.18145600 |
| H | 8.73218800  | 1.50069000  | -0.04204100 |
| H | 7.65151400  | -0.72348800 | 0.08048100  |
| H | 2.82829900  | 1.98525300  | -0.13913100 |
| H | 5.61072500  | -2.11438200 | 0.14652800  |
| H | 3.54421900  | -3.49821000 | 0.20465200  |
| H | 1.08800400  | -3.66834000 | 0.18777700  |
| H | 0.79795000  | 0.61434900  | -0.07471000 |
| H | -0.89264300 | -2.66118300 | 0.05649500  |
| H | -2.89577700 | -2.26997300 | -0.19237200 |
| H | -5.09617100 | -2.42908500 | -0.53588900 |
| H | -7.32804300 | -1.39729900 | -0.53188300 |
| H | -5.55864700 | 2.38946600  | 0.41762900  |
| H | -3.34385100 | 1.36301700  | 0.41608300  |
| H | -9.13529800 | 2.58916200  | 0.12432800  |
| H | -7.55083900 | 3.04149300  | -0.54819400 |
| H | -7.71428400 | 2.67634800  | 1.19246100  |

### 3. OMe-2PUA:AcO<sup>-</sup> in S<sub>0</sub> state.

Charge = -1 Multiplicity = 1

|   |             |             |             |
|---|-------------|-------------|-------------|
| C | -6.02177000 | -0.24095400 | 0.02599800  |
| C | -5.32983300 | -1.49075700 | -0.11529100 |
| C | -6.09941100 | -2.68183200 | -0.24142900 |
| C | -7.46206200 | -2.64072800 | -0.22830700 |
| C | -8.14485500 | -1.40451700 | -0.08801400 |
| C | -7.44389400 | -0.24143300 | 0.03524600  |
| C | -3.93570200 | -1.50399900 | -0.12480000 |
| C | -3.18907700 | -0.33192400 | -0.00106100 |
| C | -3.88665700 | 0.91461500  | 0.13784200  |
| C | -5.27674200 | 0.93202600  | 0.14921000  |
| C | -3.10845200 | 2.10077300  | 0.26133700  |
| C | -1.75293600 | 2.05676000  | 0.24836800  |
| C | -1.04983100 | 0.81420200  | 0.11104400  |
| C | -1.76842400 | -0.34988400 | -0.01262500 |
| N | 0.33188200  | 0.92244900  | 0.10493500  |
| C | 1.24121800  | -0.10741200 | 0.05336000  |
| N | 2.52590100  | 0.34669900  | -0.02572900 |
| C | 3.69073900  | -0.42279400 | -0.02853000 |
| C | 4.89473500  | 0.25274100  | -0.27963800 |
| C | 6.10079500  | -0.41612200 | -0.28109800 |
| C | 6.15074100  | -1.78783200 | -0.03376600 |
| C | 4.96600700  | -2.46761500 | 0.21598900  |
| C | 3.74768100  | -1.79245300 | 0.22201000  |
| O | 7.38451400  | -2.36223600 | -0.05881100 |
| C | 7.46095100  | -3.75013600 | 0.19447000  |
| O | 0.92702700  | -1.29521800 | 0.07821900  |
| H | -5.57716400 | -3.62714800 | -0.34859300 |
| H | -8.03436400 | -3.55663500 | -0.32543700 |
| H | -9.22892800 | -1.39181700 | -0.07964200 |
| H | -7.96156800 | 0.70647700  | 0.14264500  |
| H | -3.41737100 | -2.45234300 | -0.23152500 |
| H | -5.79453600 | 1.88089100  | 0.25596400  |
| H | -3.62026300 | 3.05184300  | 0.36702800  |
| H | -1.16763300 | 2.96489400  | 0.34300900  |
| H | -1.25316300 | -1.29340900 | -0.11100900 |
| H | 0.69698200  | 1.89142100  | 0.19643900  |
| H | 2.67814200  | 1.36357500  | -0.17205900 |
| H | 4.86669800  | 1.31959000  | -0.47207100 |
| H | 7.02433200  | 0.11733900  | -0.47626500 |
| H | 4.96603600  | -3.53196200 | 0.41291600  |
| H | 2.83535200  | -2.33636700 | 0.41333500  |
| H | 8.51502700  | -4.01345800 | 0.13120900  |
| H | 6.90089600  | -4.32498900 | -0.55035700 |
| H | 7.08745100  | -3.99637200 | 1.19382700  |
| C | 2.26509700  | 3.85876400  | -0.07888200 |
| O | 1.13303500  | 3.56296600  | 0.38550500  |
| O | 3.11376100  | 3.02255900  | -0.47862400 |
| C | 2.61344500  | 5.33419100  | -0.16157700 |

|   |            |            |             |
|---|------------|------------|-------------|
| H | 3.62882100 | 5.48831000 | -0.52429000 |
| H | 2.50281700 | 5.79418400 | 0.82288000  |
| H | 1.91069100 | 5.83530200 | -0.83189900 |

#### 4. OMe-2PUA:AcO<sup>-</sup> in S<sub>1</sub> state.

Charge = -1 Multiplicity = 1

|   |             |             |             |
|---|-------------|-------------|-------------|
| C | -6.01556500 | -0.25002700 | 0.02115000  |
| C | -5.30889900 | -1.49434700 | -0.13372300 |
| C | -6.04833100 | -2.68243500 | -0.27676800 |
| C | -7.44446500 | -2.67211800 | -0.26621900 |
| C | -8.12450900 | -1.47217000 | -0.11457300 |
| C | -7.41673500 | -0.27350500 | 0.02875400  |
| C | -3.90172500 | -1.46928600 | -0.14349900 |
| C | -3.16637800 | -0.27442700 | 0.00522400  |
| C | -3.87209200 | 0.96681300  | 0.15517200  |
| C | -5.26916700 | 0.94606100  | 0.16639100  |
| C | -3.10980400 | 2.14686900  | 0.29711000  |
| C | -1.72766200 | 2.14350100  | 0.28882300  |
| C | -1.03227200 | 0.92812600  | 0.14671900  |
| C | -1.76852600 | -0.27452000 | -0.00627000 |
| N | 0.33465100  | 0.98261000  | 0.12725400  |
| C | 1.22277600  | -0.07973800 | 0.10911500  |
| N | 2.50703500  | 0.35415100  | -0.02551100 |
| C | 3.65655800  | -0.42965200 | -0.02598800 |
| C | 4.87316600  | 0.23622800  | -0.25420600 |
| C | 6.06624300  | -0.44979500 | -0.25868800 |
| C | 6.09191600  | -1.82861800 | -0.03509100 |
| C | 4.89412800  | -2.49822300 | 0.19075600  |
| C | 3.68801600  | -1.80783000 | 0.19589700  |
| O | 7.31209200  | -2.41739700 | -0.05814200 |
| C | 7.37358300  | -3.81262800 | 0.16943700  |
| O | 0.88890100  | -1.25548200 | 0.20824000  |
| H | -5.51230400 | -3.61890400 | -0.39510200 |
| H | -7.99267500 | -3.60087200 | -0.37731400 |
| H | -9.20892500 | -1.45784600 | -0.10539400 |
| H | -7.95571600 | 0.66116400  | 0.14676200  |
| H | -3.35940100 | -2.40324100 | -0.26033500 |
| H | -5.80911200 | 1.88151700  | 0.28286000  |
| H | -3.63598700 | 3.08955300  | 0.41240400  |
| H | -1.16459300 | 3.06216300  | 0.39630000  |
| H | -1.23042300 | -1.20400200 | -0.11658200 |
| H | 0.73334100  | 1.95334300  | 0.19949200  |
| H | 2.67651000  | 1.37056700  | -0.20246600 |
| H | 4.86010300  | 1.30630700  | -0.42774900 |
| H | 7.00031800  | 0.07097100  | -0.43537800 |
| H | 4.87871900  | -3.56589300 | 0.36644700  |
| H | 2.76519300  | -2.33987000 | 0.36720600  |
| H | 8.42599700  | -4.08231800 | 0.11165700  |



|   |            |             |             |
|---|------------|-------------|-------------|
| H | 6.81631200 | -4.36570700 | -0.59293400 |
| H | 6.98763000 | -4.07201300 | 1.16009200  |
| C | 2.32689200 | 3.82327100  | -0.11049700 |
| O | 1.19460800 | 3.54671400  | 0.36633800  |
| O | 3.14862600 | 2.96824200  | -0.52752600 |
| C | 2.70290200 | 5.28770700  | -0.21405300 |
| H | 3.77994700 | 5.41503800  | -0.31674400 |
| H | 2.33986500 | 5.84050700  | 0.65311900  |
| H | 2.21928300 | 5.71004400  | -1.09965300 |

### 5. OMe-PT(R) in S<sub>1</sub> state.

Charge = -1 Multiplicity = 1

|   |             |             |             |
|---|-------------|-------------|-------------|
| C | 5.99659900  | -0.19158300 | -0.28437300 |
| C | 5.35716200  | -1.34730600 | 0.29409600  |
| C | 6.16143200  | -2.44365800 | 0.67153700  |
| C | 7.53805600  | -2.43085100 | 0.49904000  |
| C | 8.15863700  | -1.31040700 | -0.06148500 |
| C | 7.40144800  | -0.21480100 | -0.44454700 |
| C | 3.95746100  | -1.33415000 | 0.45870500  |
| C | 3.16422600  | -0.24160200 | 0.07735200  |
| C | 3.80327100  | 0.91341100  | -0.50103200 |
| C | 5.20123700  | 0.90413800  | -0.66368300 |
| C | 2.98657500  | 1.99993900  | -0.87632300 |
| C | 1.61155700  | 1.97765900  | -0.70658400 |
| C | 0.99186500  | 0.84944200  | -0.14605200 |
| C | 1.75836300  | -0.24279800 | 0.24077600  |
| N | -0.40491300 | 0.90860100  | -0.01318700 |
| C | -1.25691500 | -0.03257100 | 0.45465000  |
| N | -2.57380200 | 0.44370800  | 0.42613100  |
| C | -3.60686800 | -0.38186300 | 0.24065200  |
| C | -4.91868300 | 0.15899700  | 0.41044600  |
| C | -6.03250800 | -0.59950900 | 0.20899000  |
| C | -5.91224500 | -1.94482000 | -0.19070200 |
| C | -4.63876600 | -2.50163700 | -0.38240400 |
| C | -3.51488800 | -1.74324900 | -0.17275900 |
| O | -7.05743800 | -2.60408600 | -0.36502000 |
| C | -7.01172100 | -3.96715600 | -0.77241800 |
| O | -0.92940800 | -1.13053100 | 0.89483800  |
| H | 5.67687100  | -3.31318500 | 1.10691800  |
| H | 8.13071800  | -3.28863600 | 0.79899200  |
| H | 9.23521600  | -1.29734700 | -0.19752000 |
| H | 7.88581500  | 0.65460800  | -0.88010700 |
| H | 3.47465400  | -2.20475400 | 0.89464900  |
| H | 5.68338000  | 1.77509300  | -1.09961500 |
| H | 3.45610100  | 2.87711200  | -1.31152900 |
| H | 1.00581000  | 2.82751200  | -1.00195500 |
| H | 1.27757300  | -1.10762400 | 0.67334200  |
| H | -0.83913200 | 1.77775600  | -0.32768200 |

|   |             |             |             |
|---|-------------|-------------|-------------|
| H | -2.87214700 | 1.97557000  | 0.71636400  |
| H | -5.01334500 | 1.19348400  | 0.71588800  |
| H | -7.02466800 | -0.18775000 | 0.34657900  |
| H | -4.53007100 | -3.52862900 | -0.70329400 |
| H | -2.53897000 | -2.18079700 | -0.31925400 |
| H | -8.04732100 | -4.28890200 | -0.84203800 |
| H | -6.48691400 | -4.57669400 | -0.03367700 |
| H | -6.53075100 | -4.06552300 | -1.74803700 |
| C | -2.51181400 | 3.79963200  | 0.14150000  |
| O | -1.63917500 | 3.45940100  | -0.64395900 |
| O | -3.15150600 | 2.95429000  | 0.91634100  |
| C | -2.95586300 | 5.21876000  | 0.30959200  |
| H | -4.00129400 | 5.30960100  | 0.00660500  |
| H | -2.34055400 | 5.88153100  | -0.29376800 |
| H | -2.89544800 | 5.50471400  | 1.36108900  |

## 6. OMe-2PUA-Tw in S<sub>1</sub> state.

Charge = -1 Multiplicity = 1

|   |             |             |             |
|---|-------------|-------------|-------------|
| C | 5.33935300  | 0.06419800  | 0.57351700  |
| C | 4.76812600  | 0.92482000  | -0.43086300 |
| C | 5.59384100  | 1.90288500  | -1.02542700 |
| C | 6.92522900  | 2.04851700  | -0.66631000 |
| C | 7.47976800  | 1.21322200  | 0.30852800  |
| C | 6.69948700  | 0.24156500  | 0.91388300  |
| C | 3.41187900  | 0.75583700  | -0.77727900 |
| C | 2.59664800  | -0.21805700 | -0.18188800 |
| C | 3.17003800  | -1.07916200 | 0.82423900  |
| C | 4.52180700  | -0.91332300 | 1.17060500  |
| C | 2.33492700  | -2.05259200 | 1.41292200  |
| C | 1.00468100  | -2.19114500 | 1.04922500  |
| C | 0.45111300  | -1.35169500 | 0.07402300  |
| C | 1.23411000  | -0.37703700 | -0.53092600 |
| N | -0.91334400 | -1.54571200 | -0.21974900 |
| C | -1.68965100 | -0.96795000 | -1.16437000 |
| N | -2.99060500 | -1.48019700 | -1.17300900 |
| C | -3.96531500 | -0.72708100 | -0.68322800 |
| C | -5.30608000 | -1.21389000 | -0.77719500 |
| C | -6.35423100 | -0.50787000 | -0.26870400 |
| C | -6.13710900 | 0.73618000  | 0.35701200  |
| C | -4.83552800 | 1.24611300  | 0.46463000  |
| C | -3.77769700 | 0.53641500  | -0.04666700 |
| O | -7.22906300 | 1.35267200  | 0.81800700  |
| C | -7.08253400 | 2.61202700  | 1.46236700  |
| O | -1.31460900 | -0.13834300 | -1.98668000 |
| H | 5.16218400  | 2.55137500  | -1.78283600 |
| H | 7.53491100  | 2.80985200  | -1.14155400 |
| H | 8.52136200  | 1.32504100  | 0.59153000  |
| H | 7.13080400  | -0.40730500 | 1.67108800  |

|   |             |             |             |
|---|-------------|-------------|-------------|
| H | 2.98259700  | 1.40598100  | -1.53497000 |
| H | 4.95144100  | -1.56338500 | 1.92824000  |
| H | 2.75244500  | -2.70770500 | 2.17140800  |
| H | 0.38728500  | -2.95046600 | 1.51923600  |
| H | 0.80360300  | 0.26643400  | -1.28419400 |
| H | -1.38331500 | -2.23748600 | 0.34400800  |
| H | -5.46263900 | -2.17005300 | -1.26082500 |
| H | -7.36954000 | -0.87864100 | -0.33835300 |
| H | -4.65434200 | 2.19852500  | 0.94371500  |
| H | -2.77674200 | 0.94063700  | 0.03929700  |
| H | -8.08598300 | 2.91705400  | 1.74740800  |
| H | -6.65471200 | 3.35148800  | 0.78167800  |
| H | -6.45952300 | 2.52352000  | 2.35525200  |

### 7. CF<sub>3</sub>-2PUA in S<sub>0</sub> state.

Charge = 0 Multiplicity = 1

|   |             |             |             |
|---|-------------|-------------|-------------|
| C | -6.36187800 | -0.06246800 | 0.01188900  |
| C | -5.55017400 | -1.24638400 | -0.00221100 |
| C | -6.19685200 | -2.51448600 | -0.00853100 |
| C | -7.55669800 | -2.60605900 | -0.00133800 |
| C | -8.35843800 | -1.43495800 | 0.01268100  |
| C | -7.77758600 | -0.20189700 | 0.01905500  |
| C | -4.16153600 | -1.12381700 | -0.00918900 |
| C | -3.53788600 | 0.12287900  | -0.00285600 |
| C | -4.35282900 | 1.30296600  | 0.01101400  |
| C | -5.73861800 | 1.18482700  | 0.01809200  |
| C | -3.69781100 | 2.56643500  | 0.01716400  |
| C | -2.34402500 | 2.65281600  | 0.01029400  |
| C | -1.53078000 | 1.47772800  | -0.00340500 |
| C | -2.12108800 | 0.24270700  | -0.01002700 |
| N | -0.15385100 | 1.70858700  | -0.00916000 |
| C | 0.85450900  | 0.77965300  | -0.01554500 |
| N | 2.10229500  | 1.36343900  | -0.01694900 |
| C | 3.34255200  | 0.73537300  | -0.02096900 |
| C | 4.47012800  | 1.56513500  | -0.01390200 |
| C | 5.74082400  | 1.02896400  | -0.01726500 |
| C | 5.91347100  | -0.35097700 | -0.03541000 |
| C | 4.79918200  | -1.17900300 | -0.03995300 |
| C | 3.51956900  | -0.65094100 | -0.03700800 |
| C | 7.28573000  | -0.93706700 | 0.01395700  |
| O | 0.66936000  | -0.42479800 | -0.01998600 |
| H | -5.58338100 | -3.40949800 | -0.01920900 |
| H | -8.03597300 | -3.57860700 | -0.00626600 |
| H | -9.43846800 | -1.52878900 | 0.01826900  |
| H | -8.38706500 | 0.69587300  | 0.02975700  |
| H | -3.55113900 | -2.02167200 | -0.01977000 |
| H | -6.34811400 | 2.08348300  | 0.02869000  |
| H | -4.29914600 | 3.46906800  | 0.02761400  |

|   |             |             |             |
|---|-------------|-------------|-------------|
| H | -1.86323800 | 3.62601000  | 0.01540000  |
| H | -1.51553400 | -0.65081200 | -0.02038900 |
| H | 0.10726200  | 2.68173100  | -0.00589100 |
| H | 2.14507400  | 2.37079800  | -0.00969400 |
| H | 4.34442000  | 2.64248300  | -0.00553000 |
| H | 6.59901700  | 1.68978400  | -0.01433600 |
| H | 4.92201800  | -2.25542500 | -0.05478000 |
| H | 2.65938800  | -1.30123700 | -0.04616600 |
| F | 7.35708700  | -2.12616400 | -0.60786600 |
| F | 7.70738800  | -1.14947900 | 1.28082300  |
| F | 8.20355800  | -0.13853000 | -0.55676500 |

### 8. CF<sub>3</sub>-2PUA in S<sub>1</sub> state.

Charge = 0 Multiplicity = 1

|   |             |             |             |
|---|-------------|-------------|-------------|
| C | -6.35765100 | -0.09238900 | 0.02340400  |
| C | -5.53402100 | -1.26637200 | -0.05872000 |
| C | -6.15187900 | -2.52493600 | -0.12538000 |
| C | -7.54606800 | -2.64950900 | -0.10395800 |
| C | -8.33786000 | -1.51797200 | -0.02130800 |
| C | -7.74637900 | -0.24667400 | 0.04444700  |
| C | -4.13595300 | -1.10695000 | -0.08497000 |
| C | -3.51479000 | 0.15970100  | -0.01221400 |
| C | -4.33972500 | 1.33190900  | 0.06736900  |
| C | -5.72972200 | 1.17571500  | 0.09412000  |
| C | -3.70437100 | 2.58485500  | 0.13478500  |
| C | -2.32045800 | 2.70917800  | 0.11250200  |
| C | -1.51940300 | 1.56945200  | 0.03302200  |
| C | -2.12573200 | 0.29203700  | -0.04061900 |
| N | -0.14976000 | 1.75450300  | -0.00049300 |
| C | 0.84966000  | 0.80278400  | 0.01716600  |
| N | 2.09541600  | 1.36869900  | -0.11009800 |
| C | 3.33167800  | 0.73173300  | -0.07932900 |
| C | 4.45919200  | 1.53369600  | -0.29247300 |
| C | 5.72539200  | 0.98818300  | -0.27137700 |
| C | 5.89206800  | -0.37389800 | -0.04323500 |
| C | 4.77777500  | -1.17317300 | 0.17267000  |
| C | 3.50227400  | -0.63554600 | 0.15358500  |
| C | 7.26489100  | -0.95735100 | 0.03052200  |
| O | 0.65170700  | -0.39273600 | 0.13320700  |
| H | -5.52975400 | -3.41155200 | -0.19068300 |
| H | -7.99936900 | -3.63259400 | -0.15470700 |
| H | -9.41806100 | -1.60648700 | -0.00436200 |
| H | -8.37356700 | 0.63631100  | 0.10906200  |
| H | -3.50834600 | -1.99089300 | -0.15023200 |
| H | -6.35641800 | 2.06050000  | 0.15878400  |
| H | -4.31516300 | 3.47899600  | 0.19973300  |
| H | -1.86244400 | 3.69062900  | 0.16494200  |
| H | -1.50079000 | -0.58595300 | -0.10279300 |

|   |            |             |             |
|---|------------|-------------|-------------|
| H | 0.13588800 | 2.72243000  | -0.00324800 |
| H | 2.14245800 | 2.36327100  | -0.27005000 |
| H | 4.33708300 | 2.59553600  | -0.47641200 |
| H | 6.58428500 | 1.62568000  | -0.44200400 |
| H | 4.89670400 | -2.23495500 | 0.35207300  |
| H | 2.64156100 | -1.26534100 | 0.31283300  |
| F | 7.29002100 | -2.25315400 | -0.32224600 |
| F | 7.78084500 | -0.89564500 | 1.27820500  |
| F | 8.13570800 | -0.31486200 | -0.76645900 |

### 9. CF<sub>3</sub>-2PUA:AcO<sup>-</sup> in S<sub>0</sub> state.

Charge = -1 Multiplicity = 1

|   |             |             |             |
|---|-------------|-------------|-------------|
| C | -6.58787000 | -0.45474700 | 0.02953000  |
| C | -5.82870900 | -1.66697500 | -0.09228000 |
| C | -6.53162900 | -2.90017300 | -0.20111800 |
| C | -7.89445200 | -2.93326300 | -0.19010700 |
| C | -8.64385300 | -1.73412000 | -0.06931800 |
| C | -8.00796700 | -0.53275800 | 0.03717800  |
| C | -4.43591600 | -1.60407400 | -0.10082700 |
| C | -3.75544300 | -0.39100600 | 0.00487200  |
| C | -4.51959700 | 0.81755100  | 0.12537500  |
| C | -5.90869400 | 0.75898400  | 0.13575500  |
| C | -3.80793100 | 2.04626200  | 0.23105600  |
| C | -2.45197400 | 2.07642400  | 0.21716300  |
| C | -1.68367100 | 0.87230800  | 0.09615100  |
| C | -2.33549500 | -0.33140800 | -0.00687100 |
| N | -0.30731300 | 1.05604800  | 0.08464600  |
| C | 0.65046300  | 0.07928200  | 0.03144500  |
| N | 1.91670300  | 0.60789000  | -0.04649700 |
| C | 3.11253300  | -0.08586600 | -0.03585500 |
| C | 4.28254700  | 0.67483600  | -0.20311700 |
| C | 5.52347800  | 0.07529400  | -0.19404700 |
| C | 5.63591300  | -1.30276400 | -0.02556500 |
| C | 4.48597600  | -2.06194800 | 0.14555600  |
| C | 3.23403300  | -1.47098800 | 0.13827500  |
| C | 6.98185600  | -1.93910500 | 0.03530600  |
| O | 0.40771800  | -1.12267100 | 0.05026500  |
| H | -5.95834800 | -3.81702600 | -0.29355700 |
| H | -8.41579900 | -3.88033700 | -0.27403000 |
| H | -9.72701100 | -1.78054600 | -0.06246400 |
| H | -8.57694300 | 0.38683700  | 0.12953800  |
| H | -3.86613400 | -2.52393500 | -0.19305300 |
| H | -6.47784400 | 1.67947000  | 0.22794700  |
| H | -4.37097600 | 2.96927000  | 0.32377800  |
| H | -1.91726100 | 3.01630300  | 0.29817700  |
| H | -1.76982400 | -1.24690800 | -0.09222200 |
| H | 0.00366500  | 2.04595300  | 0.16548300  |
| H | 2.01233300  | 1.63738700  | -0.18377400 |

|   |            |             |             |
|---|------------|-------------|-------------|
| H | 4.19349500 | 1.74643500  | -0.33939600 |
| H | 6.41042700 | 0.68351600  | -0.32837300 |
| H | 4.55928500 | -3.13489600 | 0.27910100  |
| H | 2.34621300 | -2.07121300 | 0.25952000  |
| C | 1.46604000 | 4.08466200  | -0.09435000 |
| O | 0.33693300 | 3.73448900  | 0.33312000  |
| O | 2.36435200 | 3.28809700  | -0.47244300 |
| C | 1.78847800 | 5.56640900  | -0.14079100 |
| H | 2.27362500 | 5.81803000  | -1.08532600 |
| H | 2.49578500 | 5.79932100  | 0.66006800  |
| H | 0.89527400 | 6.17539400  | -0.00718100 |
| F | 6.95555200 | -3.23801200 | -0.30999800 |
| F | 7.52181300 | -1.89301500 | 1.27631600  |
| F | 7.87192400 | -1.33640200 | -0.77513200 |

### 10. CF<sub>3</sub>-2PUA:AcO<sup>-</sup> in S<sub>1</sub> state.

Charge = -1 Multiplicity = 1

|   |             |             |             |
|---|-------------|-------------|-------------|
| C | -6.57627400 | -0.48133300 | 0.02756600  |
| C | -5.79882200 | -1.67810200 | -0.15143700 |
| C | -6.46713300 | -2.90322500 | -0.32006500 |
| C | -7.86323600 | -2.97368100 | -0.30944000 |
| C | -8.61063800 | -1.82021800 | -0.13388800 |
| C | -7.97157900 | -0.58404400 | 0.03526900  |
| C | -4.39569500 | -1.57098100 | -0.16314700 |
| C | -3.72885800 | -0.33832700 | 0.01166900  |
| C | -4.50631500 | 0.85559300  | 0.18538100  |
| C | -5.89895600 | 0.75304400  | 0.19936400  |
| C | -3.81614400 | 2.07498900  | 0.35060400  |
| C | -2.43458800 | 2.15237600  | 0.33850800  |
| C | -1.66991400 | 0.98594000  | 0.17332200  |
| C | -2.33567800 | -0.25664500 | -0.00475800 |
| N | -0.30848700 | 1.12196000  | 0.14935900  |
| C | 0.63759500  | 0.11312500  | 0.13388300  |
| N | 1.89579100  | 0.61954300  | -0.04095700 |
| C | 3.08647700  | -0.08656100 | -0.02670200 |
| C | 4.25535900  | 0.65208900  | -0.27718700 |
| C | 5.48988300  | 0.04021900  | -0.27374300 |
| C | 5.59378700  | -1.32693200 | -0.02679300 |
| C | 4.44448500  | -2.06342400 | 0.22562000  |
| C | 3.19825100  | -1.46017500 | 0.22315600  |
| C | 6.93837900  | -1.97003900 | 0.02365800  |
| O | 0.37657800  | -1.07527600 | 0.26811800  |
| H | -5.87863400 | -3.80469500 | -0.45775000 |
| H | -8.35616400 | -3.93027000 | -0.44023600 |
| H | -9.69388100 | -1.86800300 | -0.12454700 |
| H | -8.56361800 | 0.31508600  | 0.17206200  |
| H | -3.80072100 | -2.46952600 | -0.29916000 |
| H | -6.49194500 | 1.65319000  | 0.33420700  |

|   |             |             |             |
|---|-------------|-------------|-------------|
| H | -4.39583400 | 2.98282900  | 0.48555600  |
| H | -1.92702500 | 3.10069900  | 0.46314800  |
| H | -1.74501600 | -1.15078500 | -0.13671800 |
| H | 0.03469200  | 2.11465200  | 0.21470300  |
| H | 1.99568800  | 1.63885800  | -0.25839200 |
| H | 4.17091800  | 1.71480500  | -0.47261600 |
| H | 6.37777800  | 0.62906500  | -0.47261100 |
| H | 4.51303000  | -3.12719500 | 0.41933700  |
| H | 2.30962700  | -2.04259200 | 0.40807900  |
| C | 1.50429800  | 4.05786400  | -0.17891100 |
| O | 0.41549400  | 3.72706700  | 0.35935700  |
| O | 2.33986300  | 3.24298400  | -0.64796200 |
| C | 1.84615800  | 5.53281000  | -0.23317100 |
| H | 2.48341800  | 5.75491500  | -1.08906000 |
| H | 2.39908700  | 5.79407600  | 0.67398900  |
| H | 0.94433700  | 6.14391700  | -0.26480600 |
| F | 6.88412100  | -3.29761700 | -0.17282900 |
| F | 7.55142400  | -1.78995200 | 1.21641800  |
| F | 7.77919000  | -1.47064500 | -0.90166100 |

### 11. CF<sub>3</sub>-PT(L) in S<sub>1</sub> state.

Charge = -1 Multiplicity = 1

|   |             |             |             |
|---|-------------|-------------|-------------|
| C | -6.46822900 | -0.58976500 | -0.03160600 |
| C | -5.63097100 | -1.74427800 | -0.23373500 |
| C | -6.23872200 | -2.99289100 | -0.46548700 |
| C | -7.62647300 | -3.12715700 | -0.49925800 |
| C | -8.43336800 | -2.01300100 | -0.30306100 |
| C | -7.86117700 | -0.75988900 | -0.07104600 |
| C | -4.23415200 | -1.57275600 | -0.19754700 |
| C | -3.63552200 | -0.31924900 | 0.04102700  |
| C | -4.47024200 | 0.83155100  | 0.23885600  |
| C | -5.85659000 | 0.66685800  | 0.20258900  |
| C | -3.83603700 | 2.07700600  | 0.46294700  |
| C | -2.46638700 | 2.22054200  | 0.49296500  |
| C | -1.62422300 | 1.09286100  | 0.32125100  |
| C | -2.24576200 | -0.16969800 | 0.08019100  |
| N | -0.28631700 | 1.28743600  | 0.31358500  |
| C | 0.61110800  | 0.25127800  | 0.42236100  |
| N | 1.85894700  | 0.64989900  | -0.00506300 |
| C | 3.04026100  | -0.06425300 | 0.00362700  |
| C | 4.17699100  | 0.58831000  | -0.50221800 |
| C | 5.40076600  | -0.04432000 | -0.53076800 |
| C | 5.52372300  | -1.35058000 | -0.06295200 |
| C | 4.40554500  | -2.00240600 | 0.44176700  |
| C | 3.17132700  | -1.37748600 | 0.47438100  |
| C | 6.85794600  | -2.01553900 | -0.04520400 |
| O | 0.38715300  | -0.87181500 | 0.87059000  |
| H | -5.60384000 | -3.86019800 | -0.61832500 |

|   |             |             |             |
|---|-------------|-------------|-------------|
| H | -8.07208800 | -4.09926000 | -0.67892900 |
| H | -9.51331000 | -2.11239000 | -0.32842700 |
| H | -8.49796600 | 0.10593200  | 0.08119400  |
| H | -3.59305200 | -2.43700000 | -0.34731800 |
| H | -6.49518200 | 1.53325700  | 0.35050500  |
| H | -4.46432700 | 2.95019000  | 0.61374600  |
| H | -2.01764200 | 3.19046500  | 0.66445600  |
| H | -1.61737000 | -1.03472800 | -0.07710200 |
| H | 0.17030700  | 2.70612000  | 0.35072700  |
| H | 1.91765600  | 1.59471800  | -0.39851700 |
| H | 4.08177200  | 1.60354600  | -0.87070000 |
| H | 6.26305400  | 0.47833300  | -0.92749900 |
| H | 4.48985500  | -3.01881800 | 0.80800900  |
| H | 2.30375300  | -1.89128400 | 0.85786300  |
| C | 1.40889200  | 4.11316200  | -0.31791300 |
| O | 0.39507000  | 3.75736900  | 0.42011500  |
| O | 2.10007100  | 3.31826200  | -0.94826500 |
| C | 1.66217100  | 5.58989200  | -0.33660900 |
| H | 2.56720000  | 5.81407300  | -0.89614500 |
| H | 1.75055200  | 5.96435900  | 0.68468200  |
| H | 0.81101700  | 6.09681300  | -0.79672900 |
| F | 6.76714400  | -3.35471800 | -0.11795800 |
| F | 7.55396100  | -1.74860600 | 1.08468800  |
| F | 7.64196100  | -1.61946900 | -1.06428700 |

## 12. CF<sub>3</sub>-2PUA<sup>-</sup> in S<sub>1</sub> state.

Charge = -1 Multiplicity = 1

|   |             |             |             |
|---|-------------|-------------|-------------|
| C | -6.27692500 | -0.13103200 | -0.06366000 |
| C | -5.41851100 | -1.28846200 | -0.09605500 |
| C | -6.00387600 | -2.56826900 | -0.15790300 |
| C | -7.38776000 | -2.73114000 | -0.18628500 |
| C | -8.21603400 | -1.61381000 | -0.15387200 |
| C | -7.66889400 | -0.33212300 | -0.09336400 |
| C | -4.02516500 | -1.08828100 | -0.06714700 |
| C | -3.45091700 | 0.19587400  | -0.00083700 |
| C | -4.30536300 | 1.34875200  | 0.02715200  |
| C | -5.69009500 | 1.15516300  | -0.00175200 |
| C | -3.69416700 | 2.62676400  | 0.08161300  |
| C | -2.32996800 | 2.79503900  | 0.10310300  |
| C | -1.46053600 | 1.66825900  | 0.10223900  |
| C | -2.06153800 | 0.37428300  | 0.03374800  |
| N | -0.13890900 | 1.90665500  | 0.09621100  |
| C | 0.78272200  | 0.92920800  | 0.31497200  |
| N | 2.03492800  | 1.39682300  | -0.07062300 |
| C | 3.25698600  | 0.76106200  | -0.05542300 |
| C | 4.36456900  | 1.47739600  | -0.53769400 |
| C | 5.62062800  | 0.91129700  | -0.55458500 |
| C | 5.80648600  | -0.39149000 | -0.09851600 |



|   |             |             |             |
|---|-------------|-------------|-------------|
| C | 4.71674500  | -1.10705400 | 0.38278400  |
| C | 3.45132300  | -0.54905500 | 0.40381800  |
| C | 7.17422800  | -0.98327000 | -0.06713000 |
| O | 0.63613500  | -0.18863500 | 0.81451000  |
| H | -5.35259600 | -3.43674700 | -0.18296700 |
| H | -7.81560500 | -3.72656800 | -0.23338000 |
| H | -9.29393100 | -1.73600600 | -0.17568000 |
| H | -8.32174300 | 0.53495800  | -0.06871800 |
| H | -3.36788900 | -1.95326700 | -0.08884200 |
| H | -6.34466000 | 2.02216800  | 0.01883100  |
| H | -4.34071100 | 3.49987200  | 0.09991700  |
| H | -1.88525600 | 3.78231800  | 0.13807500  |
| H | -1.41592100 | -0.49255700 | 0.00885300  |
| H | 2.01493100  | 2.33702300  | -0.43514400 |
| H | 4.22767200  | 2.49005400  | -0.90110500 |
| H | 6.45883200  | 1.48366000  | -0.93378300 |
| H | 4.84958500  | -2.12128800 | 0.74048000  |
| H | 2.60604600  | -1.10852100 | 0.77365300  |
| F | 7.15662900  | -2.32520700 | -0.14143500 |
| F | 7.84351300  | -0.68007300 | 1.06980200  |
| F | 7.94612600  | -0.54416900 | -1.07799100 |

### 13. CF<sub>3</sub>-2PUA-Tw in S<sub>1</sub> state.

Charge = -1 Multiplicity = 1

|   |             |             |             |
|---|-------------|-------------|-------------|
| C | -4.04980700 | -0.86962700 | -0.17183200 |
| C | -5.30391300 | -0.30971500 | -0.38524500 |
| C | -5.44556000 | 1.07450000  | -0.35837900 |
| C | -4.34866900 | 1.87738500  | -0.12633700 |
| C | -3.07907200 | 1.32162600  | 0.09350300  |
| C | -2.94357300 | -0.07142000 | 0.05453300  |
| N | -2.03335200 | 2.20182300  | 0.30277700  |
| C | -0.70860500 | 2.01614900  | 0.68816000  |
| N | -0.40313400 | 0.77224400  | 1.11764000  |
| C | 0.84690700  | 0.28814300  | 1.06505900  |
| C | 1.15286200  | -0.87012200 | 1.83020500  |
| C | 2.40979500  | -1.42775800 | 1.77232900  |
| C | 3.43916600  | -0.91089800 | 0.94754100  |
| C | 3.14744400  | 0.24544100  | 0.14754900  |
| C | 1.86821800  | 0.81343700  | 0.21839300  |
| O | 0.01801000  | 3.01767600  | 0.68822000  |
| H | -6.41453600 | 1.52971100  | -0.52459500 |
| H | -4.46950100 | 2.95523600  | -0.10669100 |
| H | -1.97132900 | -0.51139700 | 0.21859400  |
| H | -2.24274400 | 3.17474600  | 0.13654100  |
| H | 0.37941000  | -1.28550400 | 2.46469100  |
| H | 2.63346700  | -2.30357900 | 2.37531500  |
| H | 1.64086700  | 1.67991000  | -0.38906000 |
| H | -3.92450400 | -1.94575200 | -0.19909700 |

|   |             |             |             |
|---|-------------|-------------|-------------|
| C | -6.49541200 | -1.18442800 | -0.57755500 |
| F | -7.45013000 | -0.59643200 | -1.32009900 |
| F | -7.08667300 | -1.51871100 | 0.59341500  |
| F | -6.18842100 | -2.34603600 | -1.18183000 |
| C | 4.14347800  | 0.77643200  | -0.69153000 |
| C | 5.43413300  | 0.21715800  | -0.77416500 |
| C | 5.72935800  | -0.94147500 | 0.03037500  |
| C | 4.72010900  | -1.46890700 | 0.86912300  |
| C | 7.01865000  | -1.49957400 | -0.05346100 |
| C | 7.99200100  | -0.95434700 | -0.88980800 |
| C | 7.70686600  | 0.16416500  | -1.66650600 |
| C | 6.43955000  | 0.74199600  | -1.60795400 |
| H | 3.90961300  | 1.65229000  | -1.29056900 |
| H | 4.95123300  | -2.34489400 | 1.46893500  |
| H | 7.24931500  | -2.37248700 | 0.54936600  |
| H | 8.97689700  | -1.40771300 | -0.93205800 |
| H | 8.46606400  | 0.58619600  | -2.31573500 |
| H | 6.21053700  | 1.61500300  | -2.21168300 |

#### 14. Transition state (TS) of the ESPT reactions of OMe-2PUA:AcO<sup>-</sup> along HB(R) in S<sub>1</sub> state.

Charge = -1 Multiplicity = 1

|   |             |             |             |
|---|-------------|-------------|-------------|
| C | -6.03040900 | -0.18748500 | 0.16144700  |
| C | -5.35686400 | -1.41138800 | -0.19563200 |
| C | -6.13487900 | -2.56221600 | -0.44263500 |
| C | -7.51982800 | -2.53781000 | -0.34978800 |
| C | -8.17259500 | -1.35213400 | -0.00429100 |
| C | -7.44018000 | -0.20063200 | 0.24613000  |
| C | -3.95094800 | -1.40720800 | -0.28398300 |
| C | -3.18424800 | -0.25733400 | -0.03477300 |
| C | -3.85680500 | 0.96474700  | 0.32366700  |
| C | -5.25967500 | 0.96413500  | 0.41025700  |
| C | -3.06442600 | 2.10601800  | 0.57059600  |
| C | -1.68389400 | 2.07703400  | 0.47745800  |
| C | -1.03000700 | 0.88302600  | 0.12703800  |
| C | -1.77459500 | -0.26798800 | -0.12391200 |
| N | 0.36443700  | 0.93801100  | 0.04885100  |
| C | 1.23556700  | -0.06191600 | -0.23626600 |
| N | 2.54477300  | 0.42287400  | -0.22863500 |
| C | 3.62610400  | -0.37309900 | -0.13344400 |
| C | 4.90157600  | 0.24315500  | -0.30097300 |
| C | 6.05587400  | -0.47458200 | -0.19144900 |
| C | 6.01188400  | -1.84950700 | 0.10653400  |
| C | 4.77215800  | -2.47802700 | 0.28994700  |
| C | 3.60652800  | -1.76027400 | 0.17520100  |
| O | 7.19110100  | -2.46511400 | 0.19451300  |
| C | 7.21975700  | -3.85659700 | 0.49195000  |
| O | 0.92095800  | -1.22001300 | -0.49159900 |
| H | -5.62444000 | -3.48278100 | -0.71118600 |

|   |             |             |             |
|---|-------------|-------------|-------------|
| H | -8.09273200 | -3.43802900 | -0.54531200 |
| H | -9.25502900 | -1.32977100 | 0.06910900  |
| H | -7.95073600 | 0.71971600  | 0.51483400  |
| H | -3.44070100 | -2.32797700 | -0.55371300 |
| H | -5.76878500 | 1.88550500  | 0.67996200  |
| H | -3.56090400 | 3.03320600  | 0.84097200  |
| H | -1.09679200 | 2.96799500  | 0.66934100  |
| H | -1.26700900 | -1.18338800 | -0.38885000 |
| H | 0.77638800  | 1.85043600  | 0.28698400  |
| H | 2.77722000  | 1.69532400  | -0.47863100 |
| H | 4.93909400  | 1.30105200  | -0.52758000 |
| H | 7.02210600  | -0.00420600 | -0.32597000 |
| H | 4.71893500  | -3.53117700 | 0.53004700  |
| H | 2.65601900  | -2.25144000 | 0.31123400  |
| H | 8.27055400  | -4.13303500 | 0.50887000  |
| H | 6.70172400  | -4.43006300 | -0.27990100 |
| H | 6.77235600  | -4.05508700 | 1.46837500  |
| C | 2.44654900  | 3.71132300  | -0.11858700 |
| O | 1.47120800  | 3.47940100  | 0.60116400  |
| O | 3.10131100  | 2.79552600  | -0.75231100 |
| C | 2.96159000  | 5.10899100  | -0.31613400 |
| H | 2.31928600  | 5.83125200  | 0.18296600  |
| H | 3.01794600  | 5.33511300  | -1.38252900 |
| H | 3.97500100  | 5.18137200  | 0.08517300  |

**15. The TS of the ESPT reactions of CF<sub>3</sub>-2PUA:AcO<sup>-</sup> along HB(L) in S<sub>1</sub> state.**

Charge = -1 Multiplicity = 1

|   |             |             |             |
|---|-------------|-------------|-------------|
| C | 6.47075900  | -0.58812100 | 0.03441400  |
| C | 5.63492400  | -1.74420500 | 0.23174700  |
| C | 6.24403600  | -2.99246400 | 0.46085600  |
| C | 7.63225400  | -3.12459100 | 0.49622700  |
| C | 8.43749600  | -2.00905000 | 0.30450900  |
| C | 7.86323100  | -0.75568200 | 0.07514500  |
| C | 4.23804500  | -1.57472200 | 0.19445200  |
| C | 3.63729900  | -0.32108800 | -0.04105400 |
| C | 4.47094700  | 0.83134200  | -0.23405400 |
| C | 5.85712200  | 0.66853700  | -0.19711300 |
| C | 3.83566300  | 2.07633400  | -0.45518700 |
| C | 2.46523400  | 2.21797500  | -0.48647300 |
| C | 1.62650900  | 1.08916300  | -0.31761500 |
| C | 2.24792500  | -0.17372600 | -0.08000600 |
| N | 0.28654600  | 1.28126300  | -0.31093300 |
| C | -0.61764200 | 0.24888300  | -0.41609900 |
| N | -1.86597900 | 0.65870900  | -0.00564000 |
| C | -3.05180400 | -0.04834300 | -0.02857900 |
| C | -4.18922100 | 0.61140800  | 0.46596300  |
| C | -5.41798400 | -0.01210500 | 0.47869300  |
| C | -5.54851600 | -1.30999300 | -0.00966200 |

|   |             |             |             |
|---|-------------|-------------|-------------|
| C | -4.42827100 | -1.97129800 | -0.49721200 |
| C | -3.18918600 | -1.35539000 | -0.51433200 |
| C | -6.86673200 | -2.00369700 | 0.05363300  |
| O | -0.39075500 | -0.87980500 | -0.84644500 |
| H | 5.61043000  | -3.86123500 | 0.61031500  |
| H | 8.07895800  | -4.09654300 | 0.67380800  |
| H | 9.51751700  | -2.10659800 | 0.33110900  |
| H | 8.49890800  | 0.11151300  | -0.07361100 |
| H | 3.59813000  | -2.44037000 | 0.34092700  |
| H | 6.49458400  | 1.53632200  | -0.34160300 |
| H | 4.46252400  | 2.95099600  | -0.60277900 |
| H | 2.01462900  | 3.18747000  | -0.65505200 |
| H | 1.62008400  | -1.03978400 | 0.07298300  |
| H | -0.14808200 | 2.61683800  | -0.34649000 |
| H | -1.92422100 | 1.60419600  | 0.39212300  |
| H | -4.09013200 | 1.62475700  | 0.83855600  |
| H | -6.28180900 | 0.51793700  | 0.86194800  |
| H | -4.51833700 | -2.98143700 | -0.87912600 |
| H | -2.32266800 | -1.87289600 | -0.89516800 |
| C | -1.38596500 | 4.08243300  | 0.31888200  |
| O | -0.38796400 | 3.71008900  | -0.42107400 |
| O | -2.09066300 | 3.30040500  | 0.95769300  |
| C | -1.62247200 | 5.56394600  | 0.34370300  |
| H | -2.52206200 | 5.79920600  | 0.90786500  |
| H | -1.71073100 | 5.94270800  | -0.67606200 |
| H | -0.76311300 | 6.05926300  | 0.80133900  |
| F | -7.06013300 | -2.64017600 | 1.23244100  |
| F | -7.00199300 | -2.94057300 | -0.90092600 |
| F | -7.90069900 | -1.15379700 | -0.08168100 |

## 16. The TS of the CF<sub>3</sub>-2PUA<sup>-</sup> twisting in S<sub>1</sub> state.

Charge = -1 Multiplicity = 1

|   |             |             |             |
|---|-------------|-------------|-------------|
| C | 5.31454800  | 0.59634700  | -0.58405600 |
| C | 4.67189900  | 0.99919800  | 0.64076700  |
| C | 5.33056400  | 1.91103800  | 1.48728400  |
| C | 6.58536100  | 2.42437300  | 1.16148900  |
| C | 7.20537000  | 2.03467200  | -0.02015500 |
| C | 6.57850600  | 1.13264500  | -0.88175700 |
| C | 3.40565900  | 0.46100900  | 0.93971500  |
| C | 2.75624300  | -0.45216000 | 0.08639200  |
| C | 3.39417100  | -0.85070300 | -1.13735300 |
| C | 4.65230500  | -0.32055400 | -1.43621500 |
| C | 2.70909500  | -1.75903600 | -1.98083900 |
| C | 1.46277700  | -2.26078000 | -1.67476500 |
| C | 0.82813000  | -1.90323400 | -0.46057100 |
| C | 1.49692500  | -0.97725900 | 0.39503600  |
| N | -0.40916200 | -2.37989600 | -0.21274900 |
| C | -0.93244200 | -2.41947100 | 1.01870700  |

|   |             |             |             |
|---|-------------|-------------|-------------|
| N | -2.38277500 | -2.51878100 | 1.00952600  |
| C | -3.12889300 | -1.43123800 | 0.61810600  |
| C | -4.43777500 | -1.60239200 | 0.14389900  |
| C | -5.21102100 | -0.51292000 | -0.20020100 |
| C | -4.69854600 | 0.77745400  | -0.09314400 |
| C | -3.40212500 | 0.95831900  | 0.37801600  |
| C | -2.62382800 | -0.12742200 | 0.72798600  |
| C | -5.55278200 | 1.95298700  | -0.41637300 |
| O | -0.35568900 | -2.45368100 | 2.10207300  |
| H | 4.84147500  | 2.21186800  | 2.40871000  |
| H | 7.07408400  | 3.12517700  | 1.82922600  |
| H | 8.18166700  | 2.43132600  | -0.27797300 |
| H | 7.06912000  | 0.83354000  | -1.80273100 |
| H | 2.91309800  | 0.75359800  | 1.86287800  |
| H | 5.14255400  | -0.61426900 | -2.36018700 |
| H | 3.19298600  | -2.05865500 | -2.90616500 |
| H | 0.95349900  | -2.94756500 | -2.33982900 |
| H | 1.01082700  | -0.67404700 | 1.31357300  |
| H | -2.71616000 | -3.40293800 | 0.65135500  |
| H | -4.84276500 | -2.60374900 | 0.04522300  |
| H | -6.21769500 | -0.67013600 | -0.56945700 |
| H | -2.99011000 | 1.95662400  | 0.46703600  |
| H | -1.61687000 | 0.03400200  | 1.09444800  |
| F | -6.44987500 | 1.68734300  | -1.38392500 |
| F | -4.83563900 | 3.01406400  | -0.82815700 |
| F | -6.27354000 | 2.38305600  | 0.64742200  |
